# Supplementary material for: Testing a systematic approach to identify and prioritise barriers to successful implementation of a complex healthcare intervention
Source: BMC Med Res Methodol. 2017 Feb 7;17:24. doi: 10.1186/s12874-017-0298-4 (PMC5297164; doi:10.1186/s12874-017-0298-4)
Supplement: Additional file 1: — Paper version of online questionnaire. Copy of paper based study questionnaire used for online survey. (PDF 595 kb) [file 12874_2017_298_MOESM1_ESM.pdf]

Following a review of the literature, we have determined published barriers to specific clinical practices we are interested in targeting in the T<sup>3</sup> Trial.

We would be very grateful if you could complete this survey and by doing so, help us prioritise actions to address these barriers.

Please consider your responses **on a national level** and not related to your own hospital

---

**Desired behaviour 1a: TRIAGE**

All patients presenting with persistent signs and symptoms of suspected stroke should be triaged ATS Category 1 or 2 (seen within 10 mins)

Please rank the following barriers from 1 to 6 in terms of which you believe are the **most influential in preventing clinicians from meeting the desired behaviour shown in the box above**

**Remember:**

Please consider your responses **on a national level** and not related to your own hospital

**Most influential in preventing clinicians from meeting the desired behaviour**

(Biggest barrier = 1; to smallest barrier = 6)

- ☐ ED nurses do not perceive treatment of stroke to be urgent/ a medical emergency
- ☐ A validated stroke screen tool (eg FAST, ROSIER) is not routinely used in the ED to assist in rapid patient assessment
- ☐ ED staff, residents and ambulance staff may be inadequately trained in the recognition of stroke symptoms
- ☐ Patients presenting with resolving symptoms or coordination loss are less likely to be triaged category 1 or 2
- ☐ Lack of stroke leadership to enable a culture of rapid effective stroke care
- ☐ No formal/established hospital protocol (critical pathway) for stroke management including 'Code Stroke' for rapid effective stroke care

### **Desired behaviour 1b: TRIAGE**

All patients presenting with persistent sign and symptoms of suspected stroke should be triaged ATS Category 1 or 2 ( seen within 10 mins)

Please rank the following barriers from 1 to 6 in terms of which you believe are the **most difficult barriers to overcome** in relation to the desired behaviour shown in the box above.

#### **Remember:**

Please consider your responses **on a national level** and not related to your own hospital

#### **Difficulty overcoming the barrier**

(Most difficult to overcome= 1; to least difficult to overcome = 6)

- ☐ ED nurses do not perceive treatment of stroke to be urgent/ a medical emergency
- ☐ A validated stroke screen tool (eg FAST, ROSIER) is not routinely used in the ED to assist in rapid patient assessment
- ☐ ED staff, residents and ambulance staff may be inadequately trained in the recognition of stroke symptoms
- ☐ Patients presenting with resolving symptoms or coordination loss are less likely to be triaged category 1 or 2
- ☐ Lack of stroke leadership to enable a culture of rapid effective stroke care
- ☐ No formal/established hospital protocol (critical pathway) for stroke management including 'Code Stroke' for rapid effective stroke care

|                                           |
|-------------------------------------------|
| <b>Desired behaviour 2a: THROMBOLYSIS</b> |
|-------------------------------------------|

- |                                                                                                                      |
|----------------------------------------------------------------------------------------------------------------------|
| <ul style="list-style-type: none"><li>• All stroke patients to receive full assessment for tPA eligibility</li></ul> |
|----------------------------------------------------------------------------------------------------------------------|

Please rank the following barriers from 1 to 9 in terms of which you believe are the **most influential in preventing clinicians from meeting the desired behaviour shown in the box above**

**Remember:**

Please consider your responses **on a national level** and not related to your own hospital

**Most influential in preventing clinicians from meeting the desired behaviour**

(Biggest barrier = 1; to smallest barrier =9)

- ☐ Physician lack of knowledge/ limited experience with tPA
- ☐ ED non-triage staff have poor recognition of stroke symptoms and have inadequate appreciation of the critical importance of time in the management of acute ischaemic stroke
- ☐ Stressful and overburdened working conditions
- ☐ Lack of staff continuity - staff turnover, leadership changes
- ☐ Lack of tPA protocol
- ☐ Lack of clinical leadership and institutional support for tPA
- ☐ Delays in obtaining CT scans (accessing CT scanner - pt block, distance from ED to CT, reading/interpreting scans)
- ☐ Disagreements between emergency services staff and neurologists regarding benefits of tPA
- ☐ Lack of teamwork

|                                           |
|-------------------------------------------|
| <b>Desired behaviour 2b: THROMBOLYSIS</b> |
|-------------------------------------------|

- |                                                                                                               |
|---------------------------------------------------------------------------------------------------------------|
| <ul style="list-style-type: none"><li>• All patients to receive full assessment for tPA eligibility</li></ul> |
|---------------------------------------------------------------------------------------------------------------|

Please rank the following barriers from 1 to 9 in terms of which you believe are the **most difficult barriers to overcome in relation to the desired behaviour shown in the box above.**

**Remember:**

Please consider your responses on a national level and not related to your own hospital

**Difficulty overcoming the barrier**

(Most difficult to overcome= 1; to least difficult to overcome = 9)

- ☐ Physician lack of knowledge/ limited experience with tPA
- ☐ ED non-triage staff have poor recognition of stroke symptoms and have inadequate appreciation of the critical importance of time in the management of acute ischaemic stroke
- ☐ Stressful and overburdened working conditions
- ☐ Lack of staff continuity - staff turnover, leadership changes
- ☐ Lack of tPA protocol
- ☐ Lack of clinical leadership and institutional support for tPA
- ☐ Delays in obtaining CT scans (accessing CT scanner - pt block, distance from ED to CT, reading/interpreting scans)
- ☐ Disagreements between emergency services staff and neurologists regarding benefits of tPA
- ☐ Lack of teamwork

|                                           |
|-------------------------------------------|
| <b>Desired behaviour 3a: THROMBOLYSIS</b> |
|-------------------------------------------|

- |                                                                                     |
|-------------------------------------------------------------------------------------|
| <ul style="list-style-type: none"><li>• All eligible patients receive tPA</li></ul> |
|-------------------------------------------------------------------------------------|

Please rank the following barriers from 1 to 8 in terms of which you believe are the **most influential in preventing clinicians from meeting the desired behaviour shown in the box above**

**Remember:**

Please consider your responses **on a national level** and not related to your own hospital

**Most influential in preventing clinicians from meeting the desired behaviour**

(Biggest barrier = 1; to smallest barrier =8)

- ☐ No point of care testing in ED and/ or delays in laboratory testing
- ☐ Emergency department staff don't triage stroke as an emergency and therefore not considered time critical
- ☐ Delays - in requesting CT scan, transporting the patient to Radiology, conducting CT scan and reporting scan by radiologist
- ☐ Tasks performed sequentially rather than concurrently lead to delays
- ☐ tPA not stored in ED
- ☐ Lack of appropriately trained staff to monitor tPA patients and manage any complications
- ☐ Difficulties obtaining informed consent (patient/relative) for thrombolysis
- ☐ Out of hours delays due to staffing/resourcing issues

|                                           |
|-------------------------------------------|
| <b>Desired behaviour 3b: THROMBOLYSIS</b> |
|-------------------------------------------|

- |                                                                                     |
|-------------------------------------------------------------------------------------|
| <ul style="list-style-type: none"><li>• All eligible patients receive tPA</li></ul> |
|-------------------------------------------------------------------------------------|

Please rank the following barriers from 1 to 8 in terms of which you believe are the **most difficult barriers to overcome in relation to the desired behaviour shown in the box above.**

**Remember:**

Please consider your responses **on a national level** and not related to your own hospital

**Difficulty overcoming the barrier**

(Most difficult to overcome= 1; to least difficult to overcome = 8)

- ☐ No point of care testing in ED and/ or delays in laboratory testing
- ☐ Emergency department staff don't triage stroke as an emergency and therefore not considered time critical
- ☐ Delays - in requesting CT scan, transporting the patient to Radiology, conducting CT scan and reporting scan by radiologist
- ☐ Tasks performed sequentially rather than concurrently lead to delays
- ☐ tPA not stored in ED
- ☐ Lack of appropriately trained staff to monitor tPA patients and manage any complications
- ☐ Difficulties obtaining informed consent (patient/relative) for thrombolysis
- ☐ Out of hours delays due to staffing/resourcing issues

**Desired behaviour 4a: FEVER**

- All patients should have their temperature taken on arrival to Emergency Departments (ED) and then sixth hourly whilst they remain in ED

Please rank the following barriers from 1 to 5 in terms of which you believe are the **most influential in preventing clinicians from meeting the desired behaviour shown in the box above**

**Remember:**

Please consider your responses on a national level and not related to your own hospital

**Most influential in preventing clinicians from meeting the desired behaviour**

(Biggest barrier = 1; to smallest barrier =5)

- ☐ Managing and organising busy nursing workload
- ☐ Belief that a patient's condition and individual nurse's clinical judgement should determine the frequency of patient observations
- ☐ Lack of fever protocols defining monitoring and treatment
- ☐ The longer the patient stays in the ED, the longer the interval between vital signs' assessment
- ☐ Patients with less acute (higher triage) category have their vital signs monitored less frequently than patients with a higher acute triage category

**Desired behaviour 4b: FEVER**

- All patients should have their temperature taken on arrival to Emergency Departments (ED) and then sixth hourly whilst they remain in ED

Please rank the following barriers from 1 to 5 in terms of which you believe are the **most difficult barriers to overcome in relation to the desired behaviour shown in the box above.**

**Remember:**

Please consider your responses **on a national level** and not related to your own hospital

**Difficulty overcoming the barrier**

(Most difficult to overcome= 1 ; to least difficult to overcome = 5)

- ☐ Managing and organising busy nursing workload
- ☐ Belief that a patient's condition and individual nurse's clinical judgement should determine the frequency of patient observations
- ☐ Lack of fever protocols defining monitoring and treatment
- ☐ The longer the patient stays in the ED, the longer the interval between vital signs' assessment
- ☐ Patients with less acute (higher triage) category have their vital signs monitored less frequently than patients with a higher acute triage category

**Desired behaviour 5a: FEVER**

- Treatment of a temperature 37.5°C or greater with paracetamol within one hour

Please rank the following barriers from 1 to 4 in terms of which you believe are the **most influential in preventing clinicians from meeting the desired behaviour shown in the box above**

**Remember:**

Please consider your responses **on a national level** and not related to your own hospital

**Most influential in preventing clinicians from meeting the desired behaviour**

(Biggest barrier = 1; to smallest barrier =4)

- ☐ Concern for patient safety issues: does administering paracetamol at  $\geq 37.5^{\circ}\text{C}$  mask infection?
- ☐ If patient Nil by mouth (NBM) intravenous (IV) paracetamol is not prescribed due to cost
- ☐ Reluctance of nurses to administer paracetamol per rectum
- ☐ Local protocols restrict nurses to only initiate 1-2 doses of paracetamol
- ☐ Other(s) [Please list] \_\_\_\_\_

\_\_\_\_\_  
\_\_\_\_\_

**Desired behaviour 5b: FEVER**

- Treatment of a temperature 37.5°C or greater with paracetamol within one hour

Please rank the following barriers from 1 to 4 in terms of which you believe are the **most difficult barriers to overcome in relation to the desired behaviour shown in the box above.**

**Remember:**

Please consider your responses **on a national level** and not related to your own hospital

**Difficulty overcoming the barrier**

(Most difficult to overcome= 1; to least difficult to overcome = 4)

- ☐ Concern for patient safety issues: does administering paracetamol at  $\geq 37.5^{\circ}\text{C}$  mask infection?
- ☐ If patient Nil by mouth (NBM) intravenous (IV) paracetamol is not prescribed due to cost
- ☐ Reluctance of nurses to administer paracetamol per rectum
- ☐ Local protocols restrict nurses to only initiate 1-2 doses of paracetamol

**Desired behaviour 6a: SUGAR**

- Record finger prick blood glucose level (BGL) on admission and monitor finger prick BGL every 6 hours (or greater if elevate)

Please rank the following barriers from 1 to 2 in terms of which you believe are the **most influential in preventing clinicians from meeting the desired behaviour shown in the box above**

**Remember:**

Please consider your responses on a national level and not related to your own hospital

**Most influential in preventing clinicians from meeting the desired behaviour**

(Biggest barrier = 1; to smallest barrier =2)

- ☐ EENs are not assessed to test BGL
- ☐ Not enough BGL machines

**Desired behaviour 6b: SUGAR**

- Record finger prick blood glucose level (BGL) on admission and monitor finger prick BGL every 6 hours (or greater if elevate)

Please rank the following barriers from 1 to 2 in terms of which you believe are the **most difficult barriers to overcome in relation to the desired behaviour shown in the box above.**

**Remember:**

Please consider your responses **on a national level** and not related to your own hospital

**Difficulty overcoming the barrier**

(Most difficult to overcome= 1; to least difficult to overcome = 2)

- ☐ EENs are not assessed to test BGL
- ☐ Not enough BGL machines

**Desired behaviour 7a: SUGAR**

- Administration of insulin to all patients with BGL > 10 mMol/L within one hour

Please rank the following barriers from 1 to 7 in terms of which you believe are the **most influential in preventing clinicians from meeting the desired behaviour shown in the box above**

**Remember:**

Please consider your responses **on a national level** and not related to your own hospital

**Most influential in preventing clinicians from meeting the desired behaviour**

(Biggest barrier = 1; to smallest barrier =7)

- ☐ Not enough syringe drivers or pumps
- ☐ Workforce issues, nurse: patient ratio an issue with insulin infusions
- ☐ Patient will require nurse escort to tests if on insulin infusion
- ☐ ED staff fear of hypoglycaemia
- ☐ Lack of consensus about the treatment of hyperglycaemia in stroke
- ☐ Lack of insulin dosage algorithms
- ☐ EENs not able to adjust insulin under their scope of practice

**Desired behaviour 7b: SUGAR**

- Administration of insulin to all patients with BGL > 10 mMol/L within one hour

Please rank the following barriers from 1 to 7 in terms of which you believe are the **most difficult barriers to overcome in relation to the desired behaviour shown in the box above.**

**Remember:**

Please consider your responses **on a national level** and not related to your own hospital

**Difficulty overcoming the barrier**

(Most difficult to overcome= 1; to least difficult to overcome = 7)

- ☐ Not enough syringe drivers or pumps
- ☐ Workforce issues, nurse: patient ratio an issue with insulin infusions
- ☐ Patient will require nurse escort to tests if on insulin infusion
- ☐ ED staff fear of hypoglycaemia
- ☐ Lack of consensus about the treatment of hyperglycaemia in stroke
- ☐ Lack of insulin dosage algorithms
- ☐ EENs not able to adjust insulin under their scope of practice

**Desired behaviour 8a: SWALLOWING**

- Patients remain NBM until a swallow screen by non- speech pathologist (SP) or swallow assessment by SP is undertaken

Please rank the following barriers from 1 to 8 in terms of which you believe are the **most influential in preventing clinicians from meeting the desired behaviour shown in the box above**

**Remember:**

Please consider your responses on a national level and not related to your own hospital

**Most influential in preventing clinicians from meeting the desired behaviour**

(Biggest barrier = 1; to smallest barrier =8)

- ☐ Doctors reluctance to use formal swallowing screen (i.e. ASSIST tool)
- ☐ Doctors prescribing immediate aspirin when patient 'Nil by mouth'
- ☐ Nurses administering aspirin before a swallow screen or assessment
- ☐ Clinicians believing 'Nil by Mouth' does not include oral medications
- ☐ Speech pathology staff shortages lead to delay in training nurses in swallow screen
- ☐ Lack of communication between Speech pathologists, doctors and nursing staff
- ☐ Swallow screening will add to nurses' already multiple complex care responsibilities in the ED
- ☐ Lack of standardised swallow screening tools in ED

**Desired behaviour 8b: SWALLOWING**

- Patients remain NBM until a swallow screen by non- speech pathologist (SP) or swallow assessment by SP is undertaken

Please rank the following barriers from 1 to 8 in terms of which you believe are the **most difficult barriers to overcome in relation to the desired behaviour shown in the box above.**

**Remember:**

Please consider your responses **on a national level** and not related to your own hospital

**Difficulty overcoming the barrier**

(Most difficult to overcome= 1; to least difficult to overcome = 8)

- ☐ Doctors reluctance to use formal swallowing screen (i.e. ASSIST tool)
- ☐ Doctors prescribing immediate aspirin when patient Nil by mouth
- ☐ Nurses administering aspirin before a swallow screen or assessment
- ☐ Clinicians believing 'Nil by Mouth' does not include oral medications
- ☐ Speech pathology staff shortages lead to delay in training nurses in swallow screen
- ☐ Lack of communication between Speech pathologists, doctors and nursing staff
- ☐ Swallow screening will add to nurses' already multiple complex care responsibilities in the ED
- ☐ Lack of standardised swallow screening tools in ED

**Desired behaviour 9a: TRANSFER**

- All patients to be discharged from ED to stroke units within 4 hours

Please rank the following barriers from 1 to 4 in terms of which you believe are the **most influential in preventing clinicians from meeting the desired behaviour shown in the box above**

**Remember:**

Please consider your responses **on a national level** and not related to your own hospital

**Most influential in preventing clinicians from meeting the desired behaviour**

(Biggest barrier = 1; to smallest barrier =4)

- ☐ Unavailability of inpatient beds in stroke unit
- ☐ Delay in obtaining a porter to transport patient from ED to SU
- ☐ Administrative procedures for transferring patients too long
- ☐ Pressure to transfer patients out of ED within 4 hours and where no stroke unit bed available means stroke patients go to general wards or medical assessment units

**Desired behaviour 9b: TRANSFER**

- All patients to be discharged from ED to stroke units within 4 hours

Please rank the following barriers from 1 to 4 in terms of which you believe are the **most difficult barriers to overcome in relation to the desired behaviour shown in the box above.**

**Remember:**

Please consider your responses **on a national level** and not related to your own hospital

**Difficulty overcoming the barrier**

(Most difficult to overcome= 1; to least difficult to overcome = 4)

- ☐ Unavailability of inpatient beds in stroke unit
- ☐ Delay in obtaining a porter to transport patient from ED to SU
- ☐ Administrative procedures for transferring patients too long

Pressure to transfer patients out of ED within 4 hours and where no stroke unit bed available means stroke patients go to general wards or medical assessment units

## Demographics

Please indicate your gender

1. ☐ Male    ☐ Female

2. How old are you?

- ☐ <20 years
- ☐ 20-24 years
- ☐ 25-29 years
- ☐ 30-34 years
- ☐ 35-39 years
- ☐ 40-44 years
- ☐ 45-49 years
- ☐ 50-54 years
- ☐ 55-59 years
- ☐ 60-64 years
- ☐ 65-70 years
- ☐ > 70 years

3. How many years have you worked in emergency care/ stroke care?

- ☐ 5 years or less
- ☐ 5-10 years
- ☐ 11-15 years
- ☐ 16 years or more

4. What is your principal role?

- ☐ Emergency Physician
- ☐ Neurologist
- ☐ Geriatrician
- ☐ Registered Nurse
- ☐ Emergency Nurse Specialist
- ☐ Stroke Nurse Specialist
- ☐ Academic
- ☐ Other, please specify \_\_\_\_\_

**5. What is your highest education program?**

- ☐ Diploma/Certificate
- ☐ Bachelor's Degree
- ☐ Medical Degree
- ☐ Master's Degree
- ☐ PhD, DN
